# Supplementary material for: Automatic evaluation of tumor budding in immunohistochemically stained colorectal carcinomas and correlation to clinical outcome
Source: Springer Nature journal article supplement (doi:10.1186/s13000-018-0739-3), 2018-08-28

Nodal infiltration stage N0

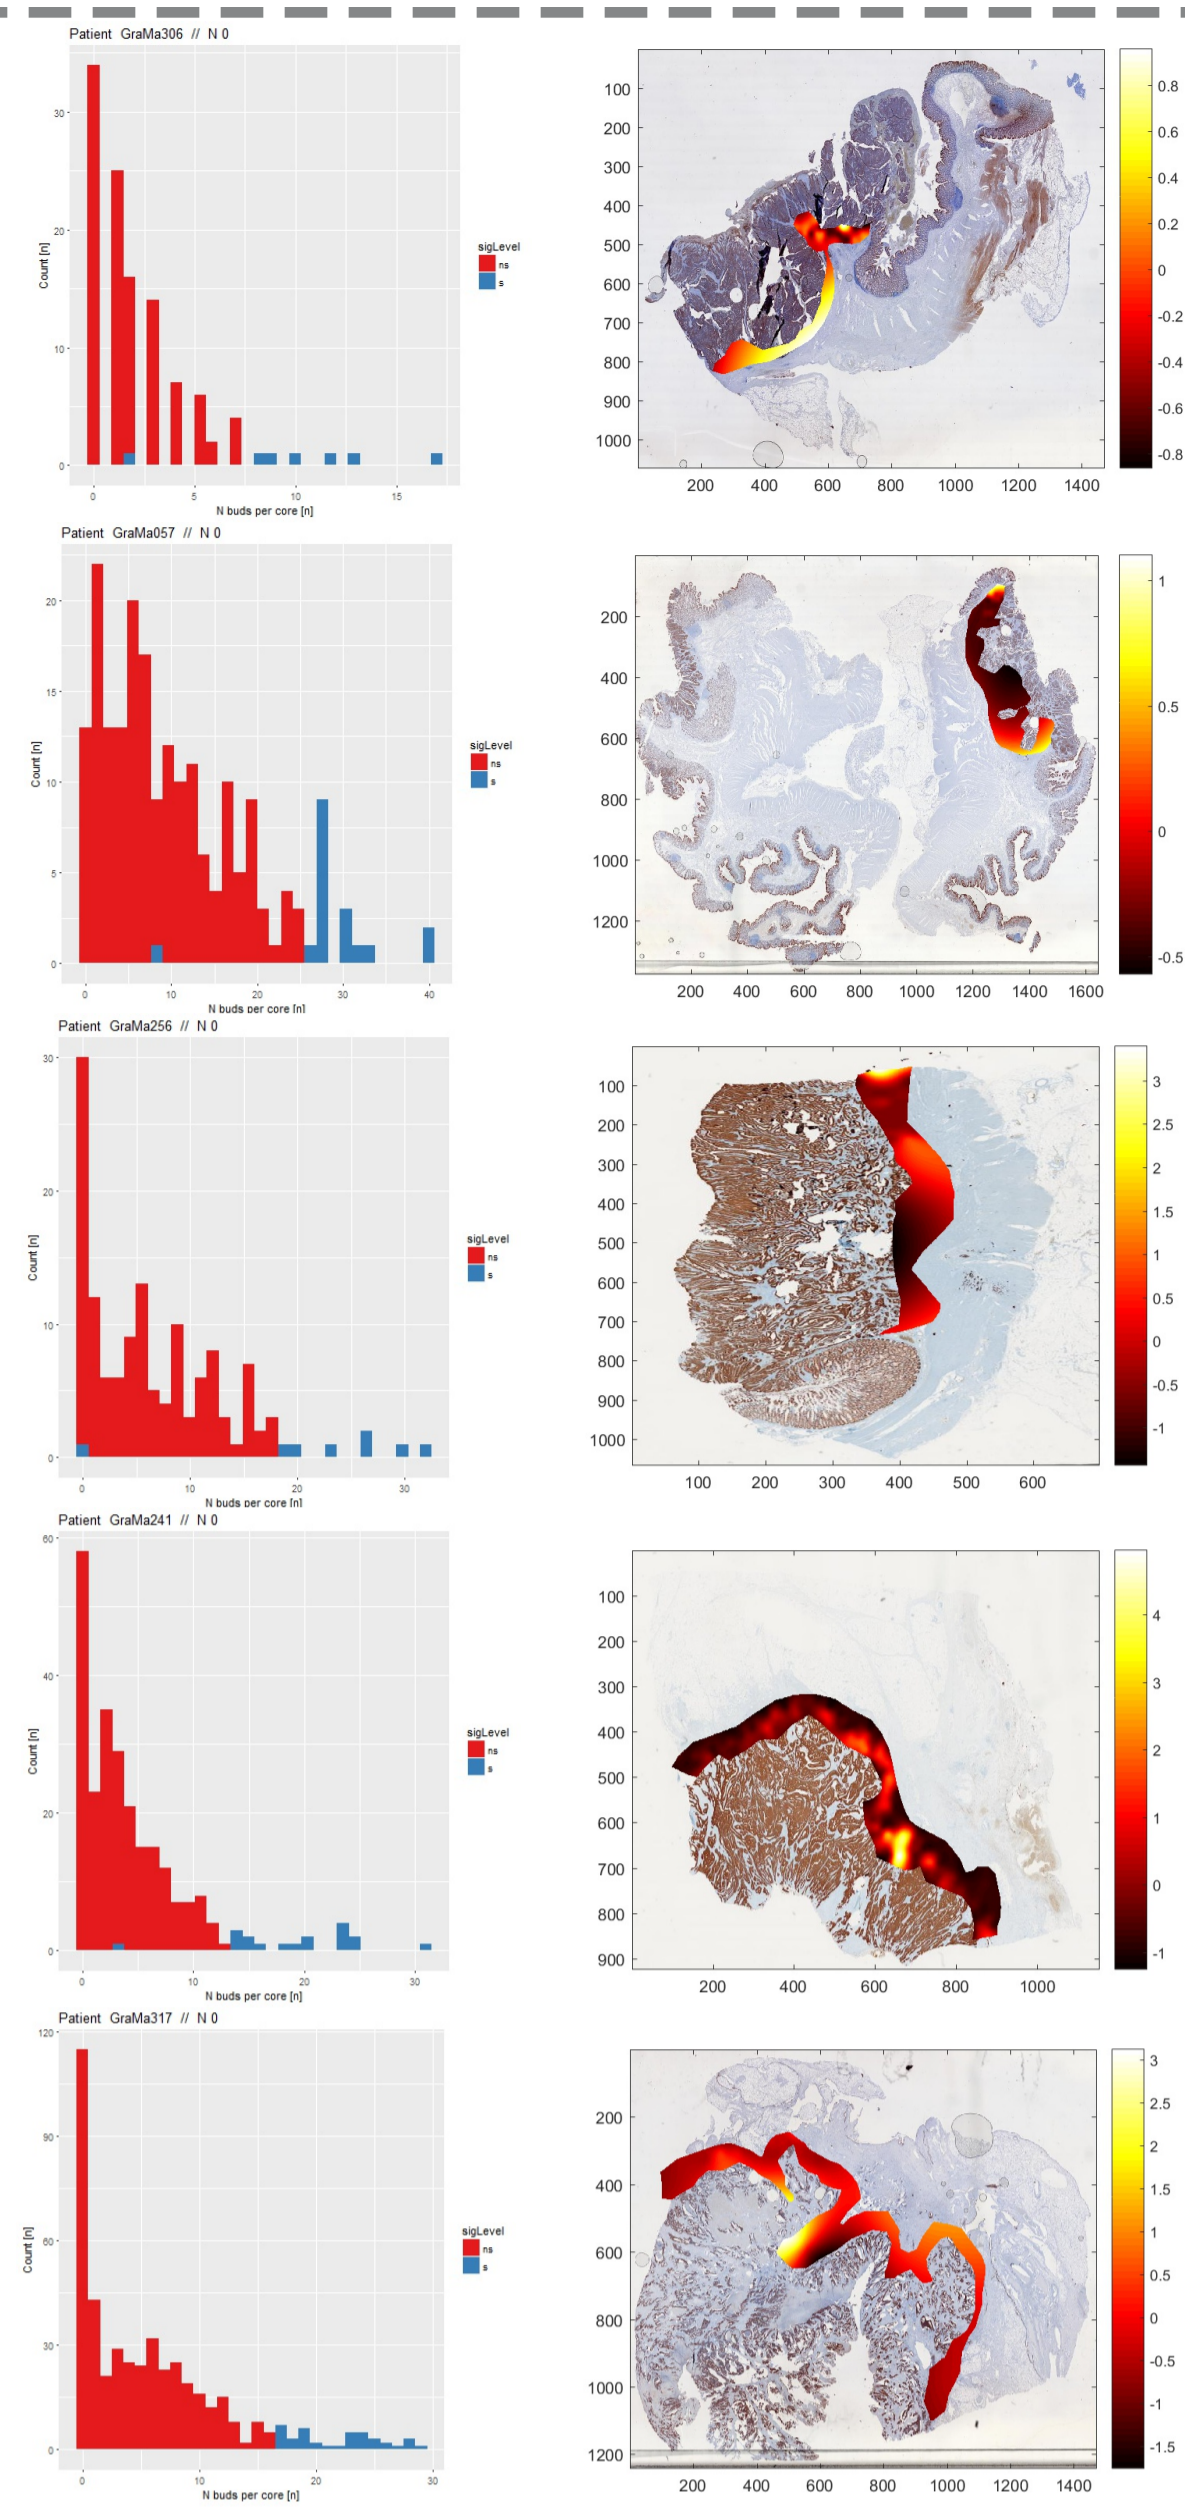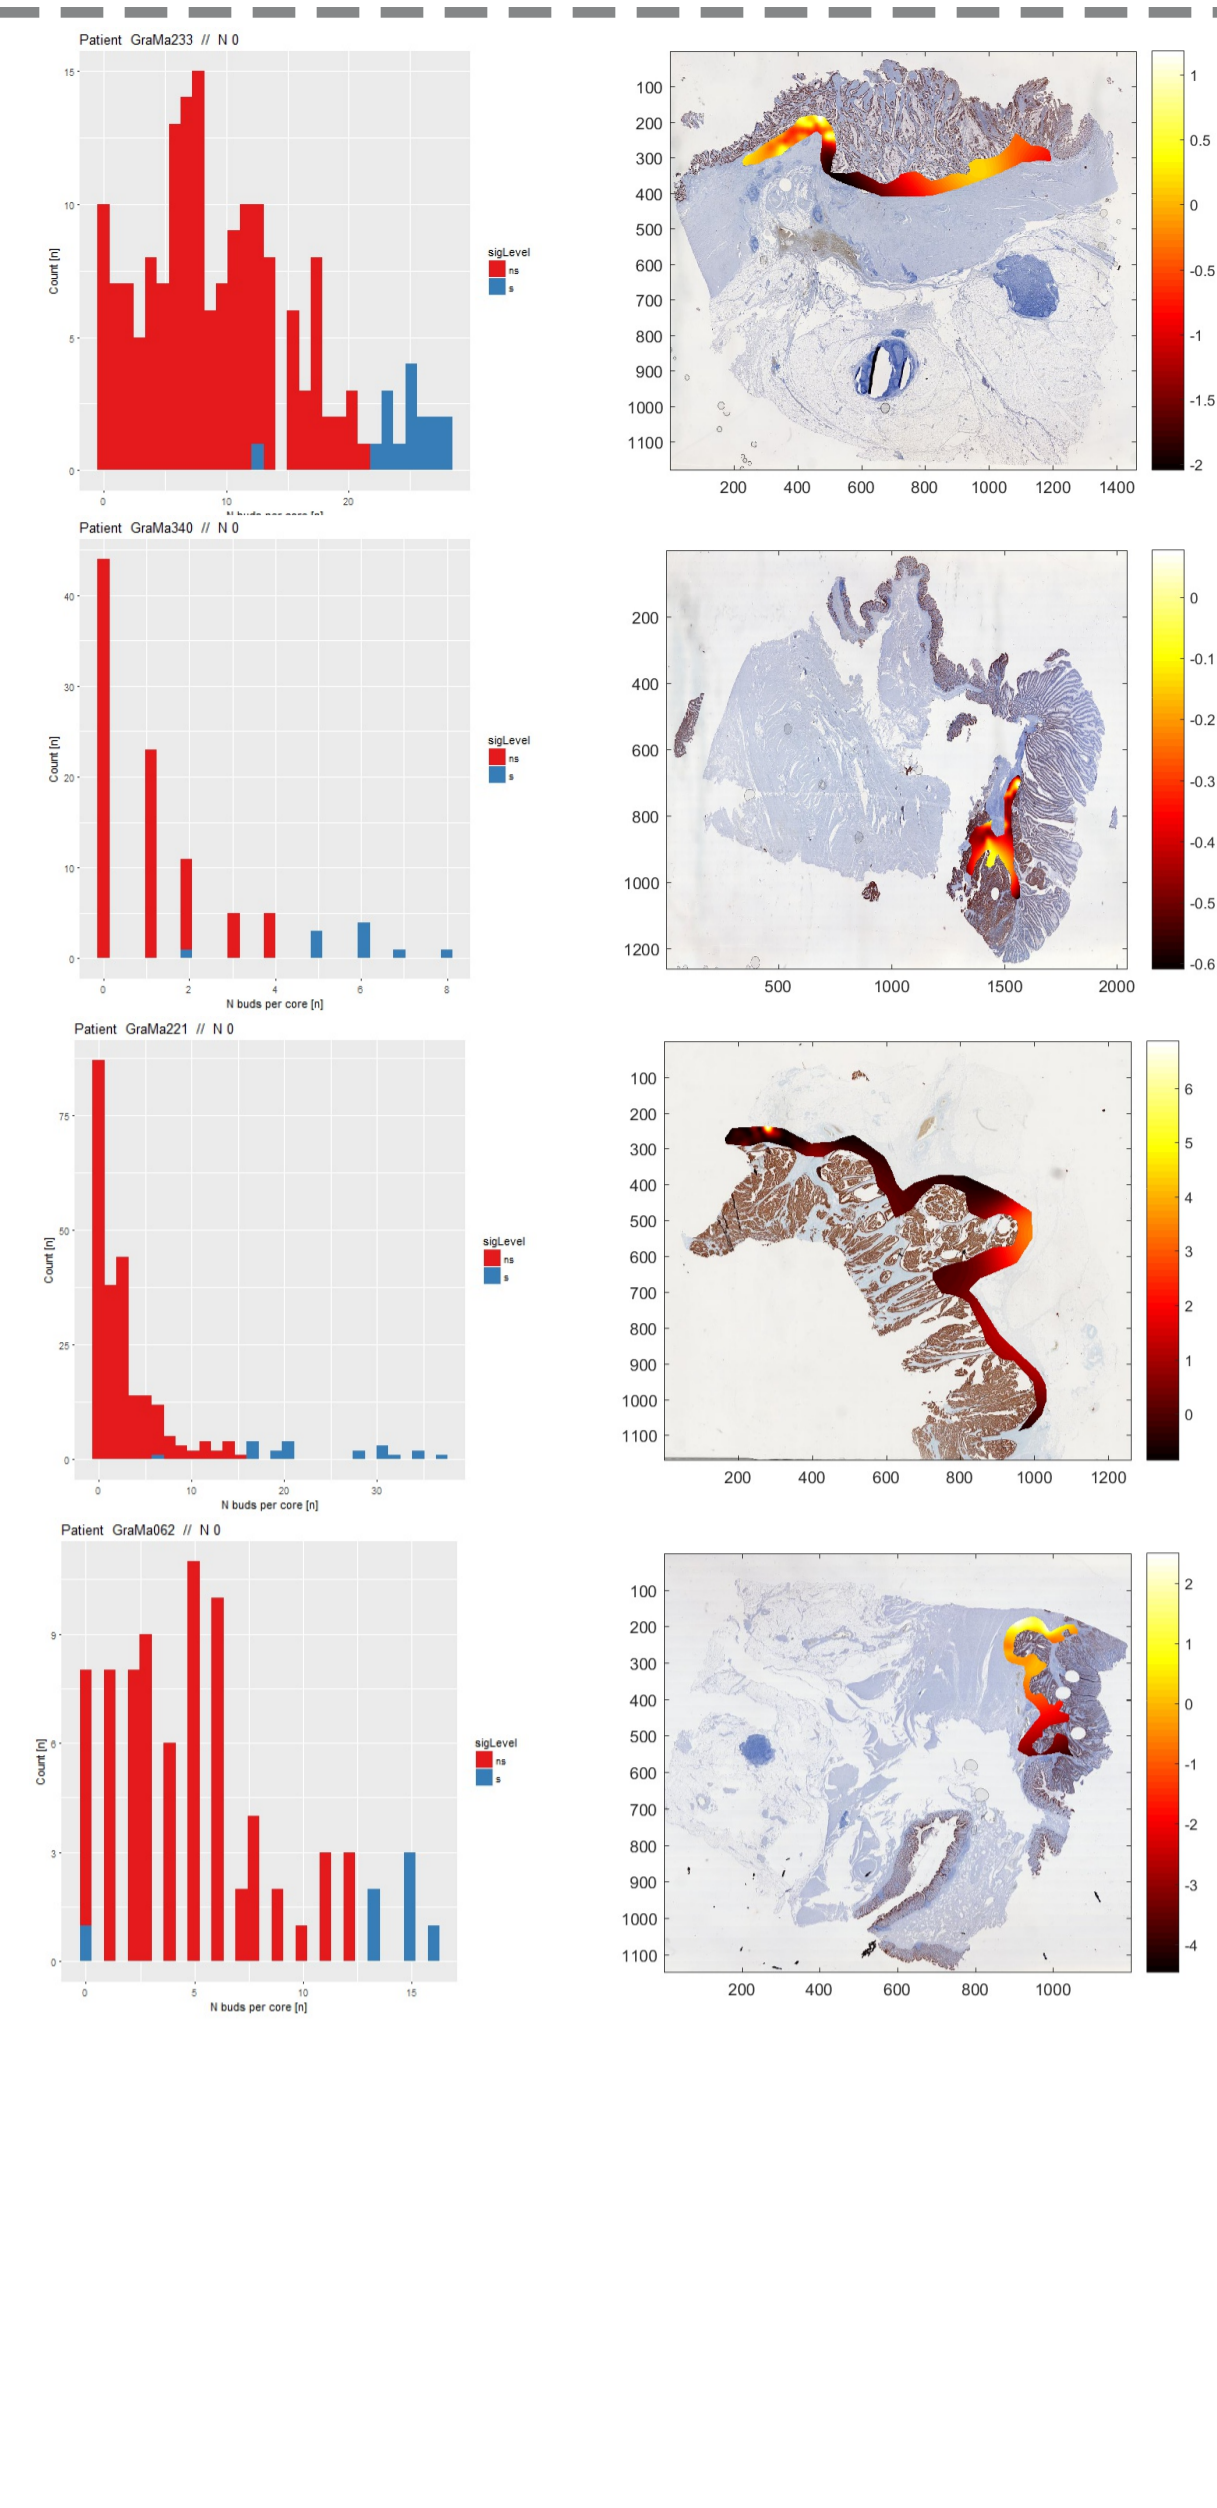

Nodal infiltration stage N1

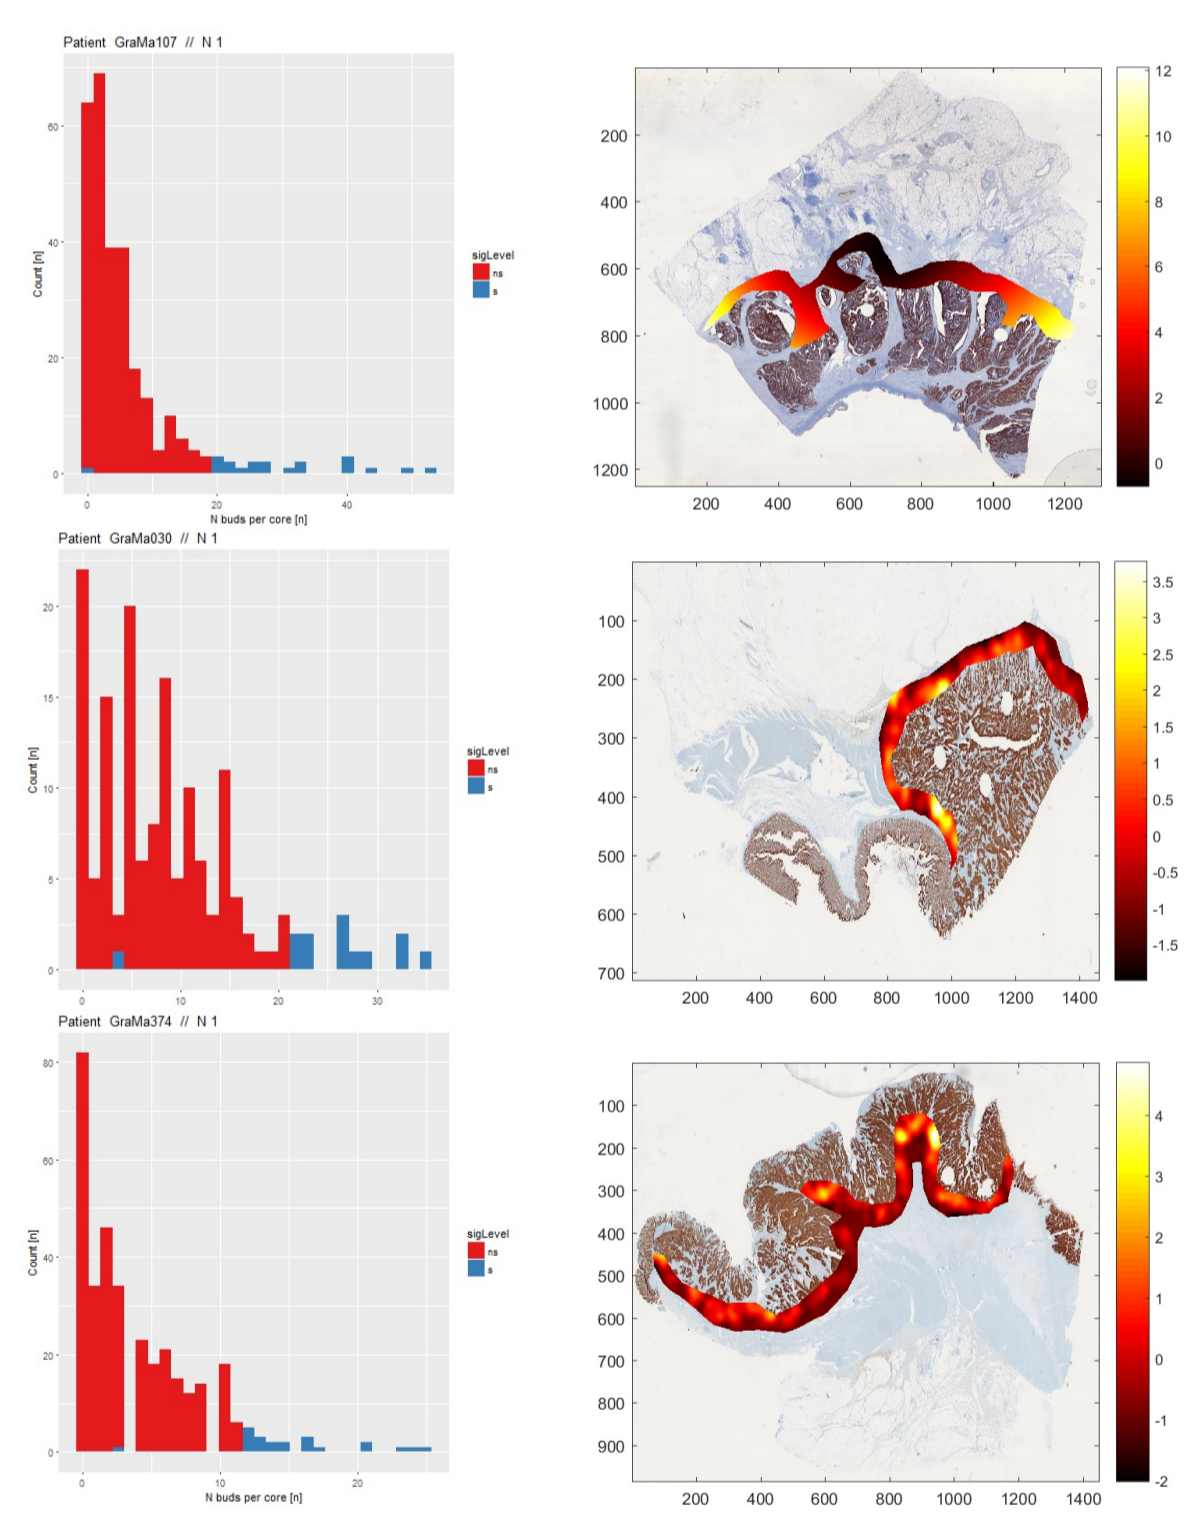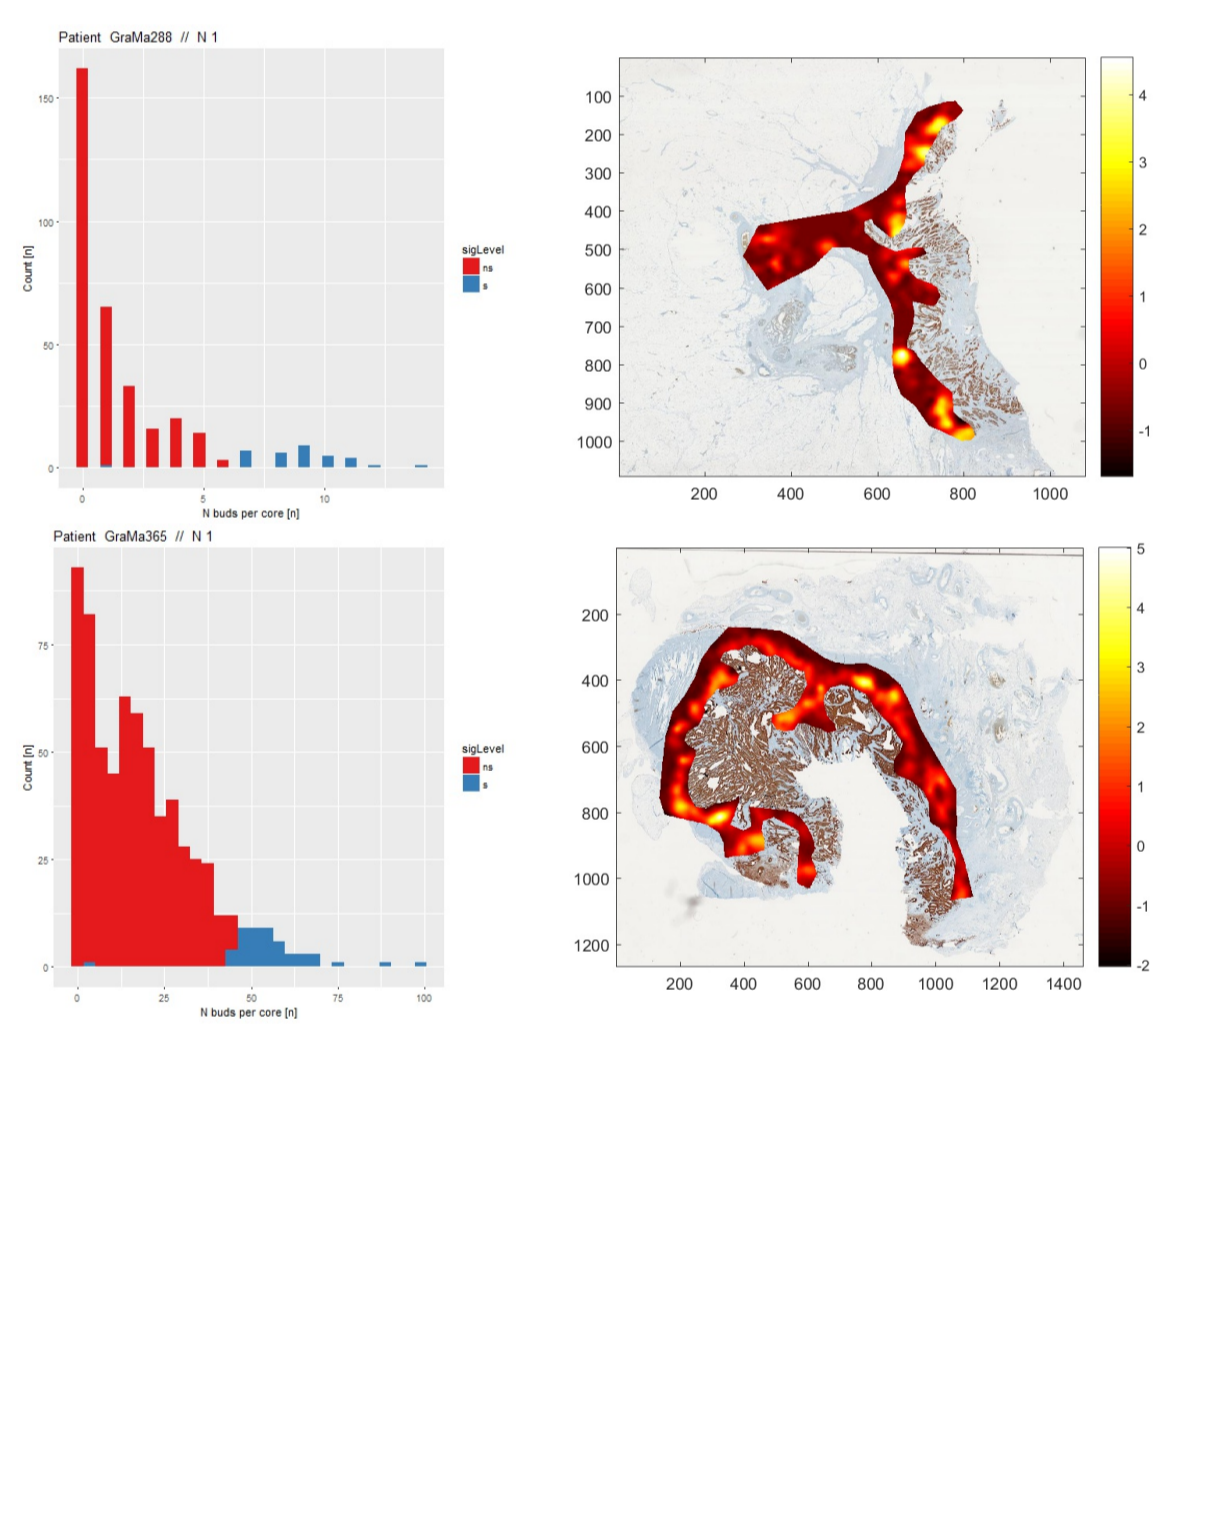

Nodal infiltration stage N2

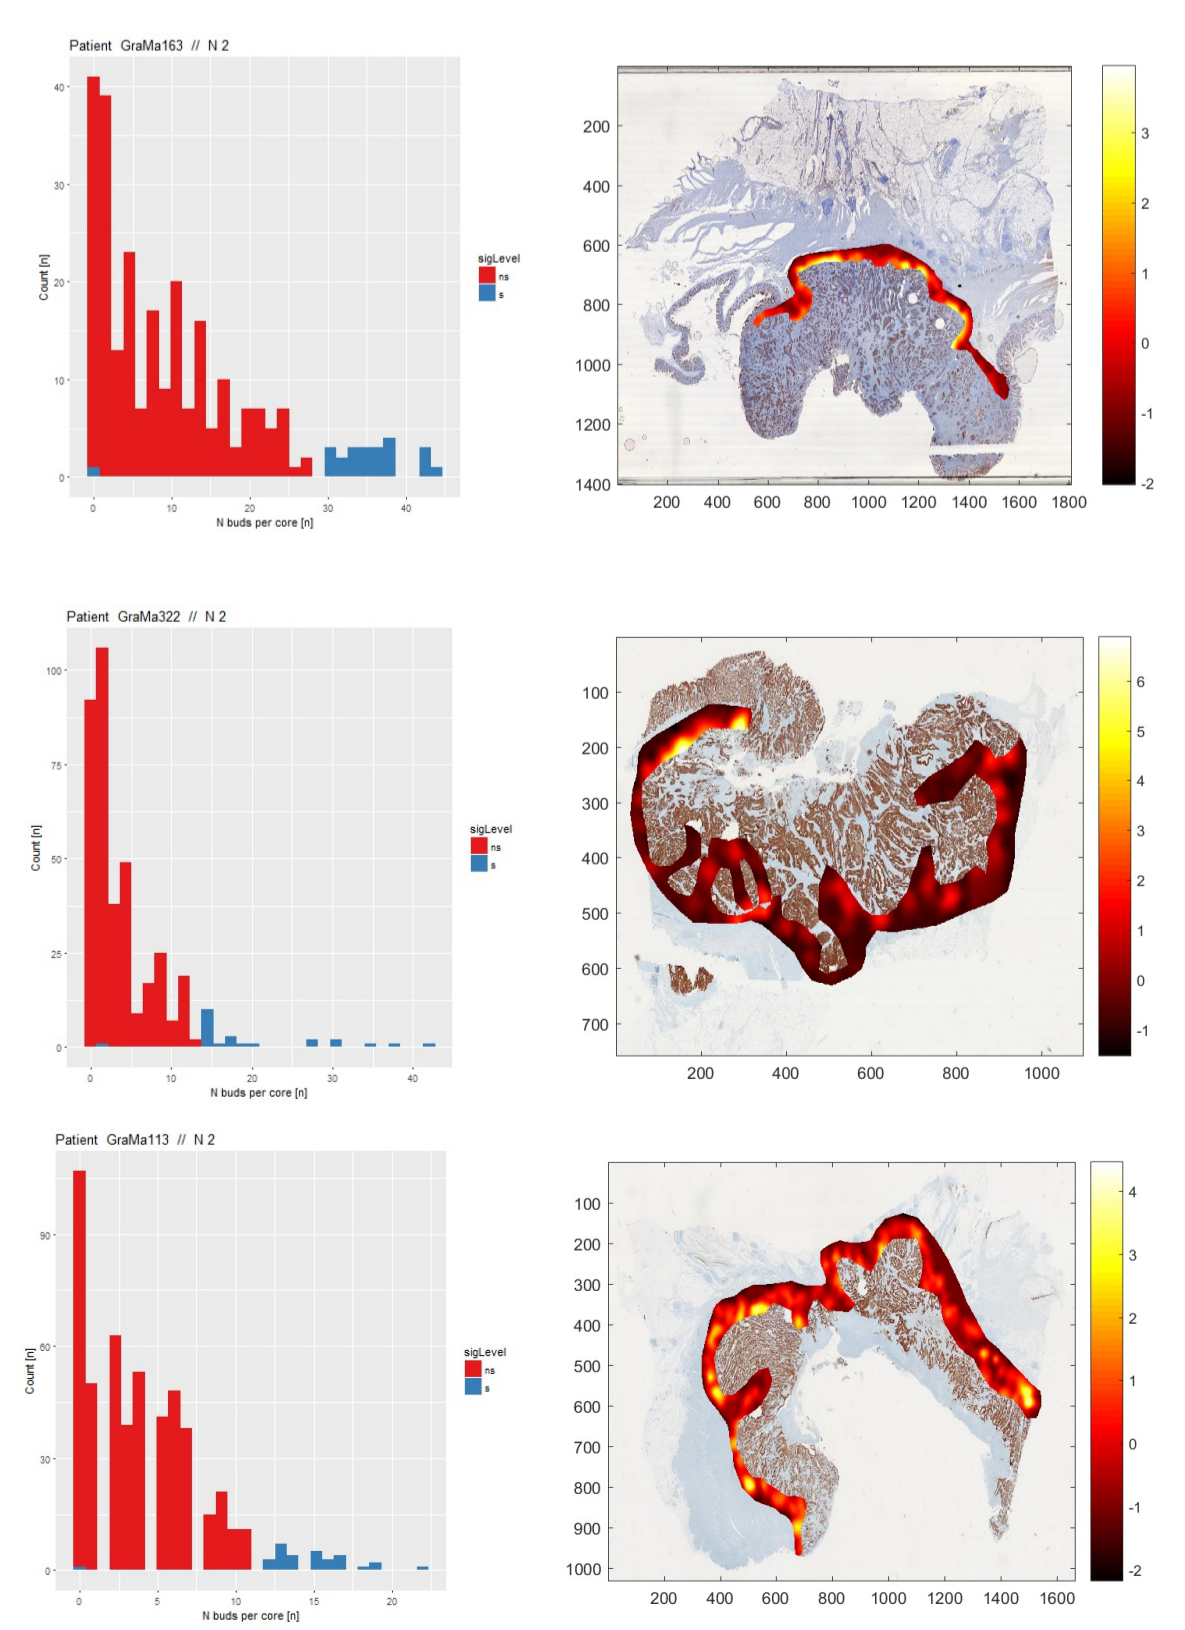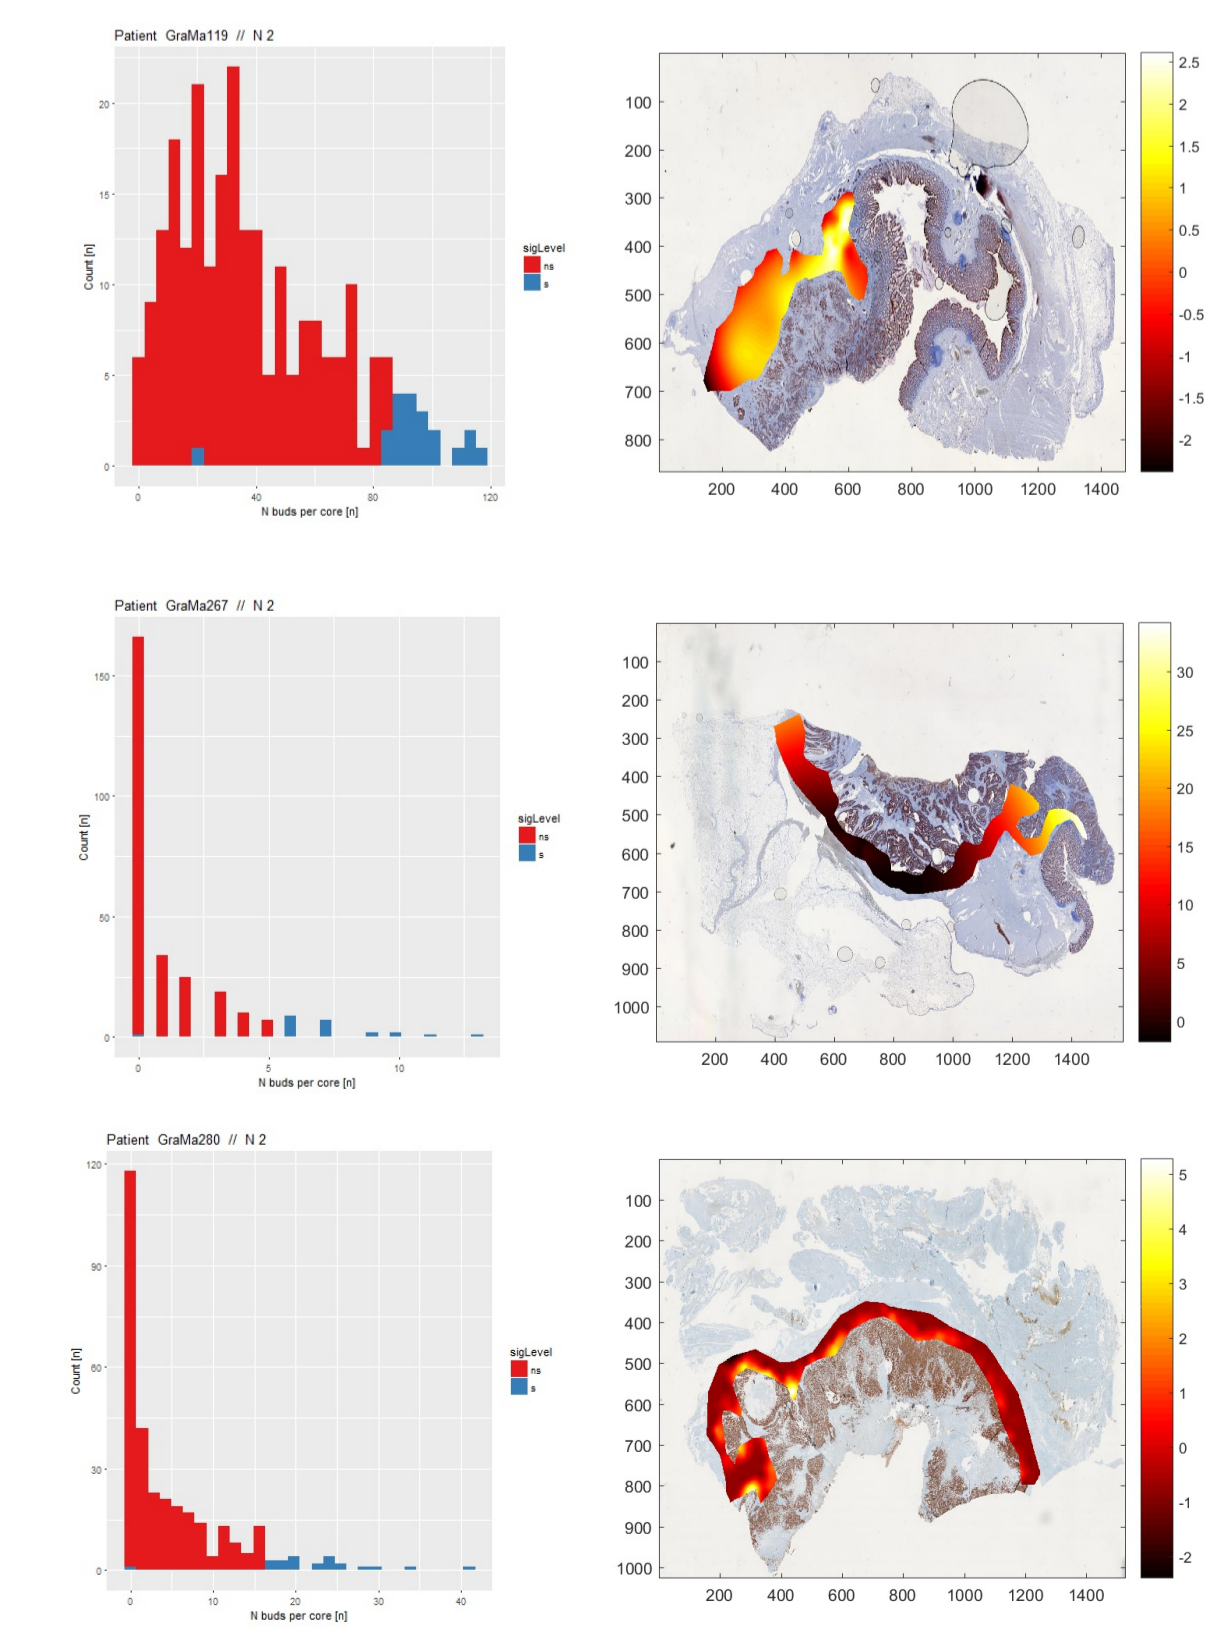

Supplement: MOESM4 [file 16078714]
